# Supplementary material for: Tetrahydrofuran Cembranoids from the Cultured Soft Coral Lobophytum crassum
Source: PubMed Central journal article supplement (PMC3280583; doi:10.3390/md9122526), 2011-12-07
Supplement: marinedrugs-09-02526-s001.pdf [file marinedrugs-09-02526-s001.pdf]

## Supporting Information

# Tetrahydrofuran Cembranoids from the Cultured Soft Coral *Lobophytum crassum*

Nai-Lun Lee and Jui-Hsin Su\*

### Table of Contents

**S1.** Table of Contents

**S2.**  $^1\text{H}$  NMR spectrum of **1** in  $\text{CDCl}_3$  at 500 MHz.

**S3.**  $^{13}\text{C}$  NMR spectrum of **1** in  $\text{CDCl}_3$  at 125 MHz.

**S4.**  $^1\text{H}$  NMR spectrum of **2** in  $\text{CDCl}_3$  at 500 MHz.

**S5.**  $^{13}\text{C}$  NMR spectrum of **2** in  $\text{CDCl}_3$  at 125 MHz.

**S6.**  $^1\text{H}$  NMR spectrum of **3** in  $\text{CDCl}_3$  at 500 MHz.

**S7.**  $^{13}\text{C}$  NMR spectrum of **3** in  $\text{CDCl}_3$  at 125 MHz.

**S1.**

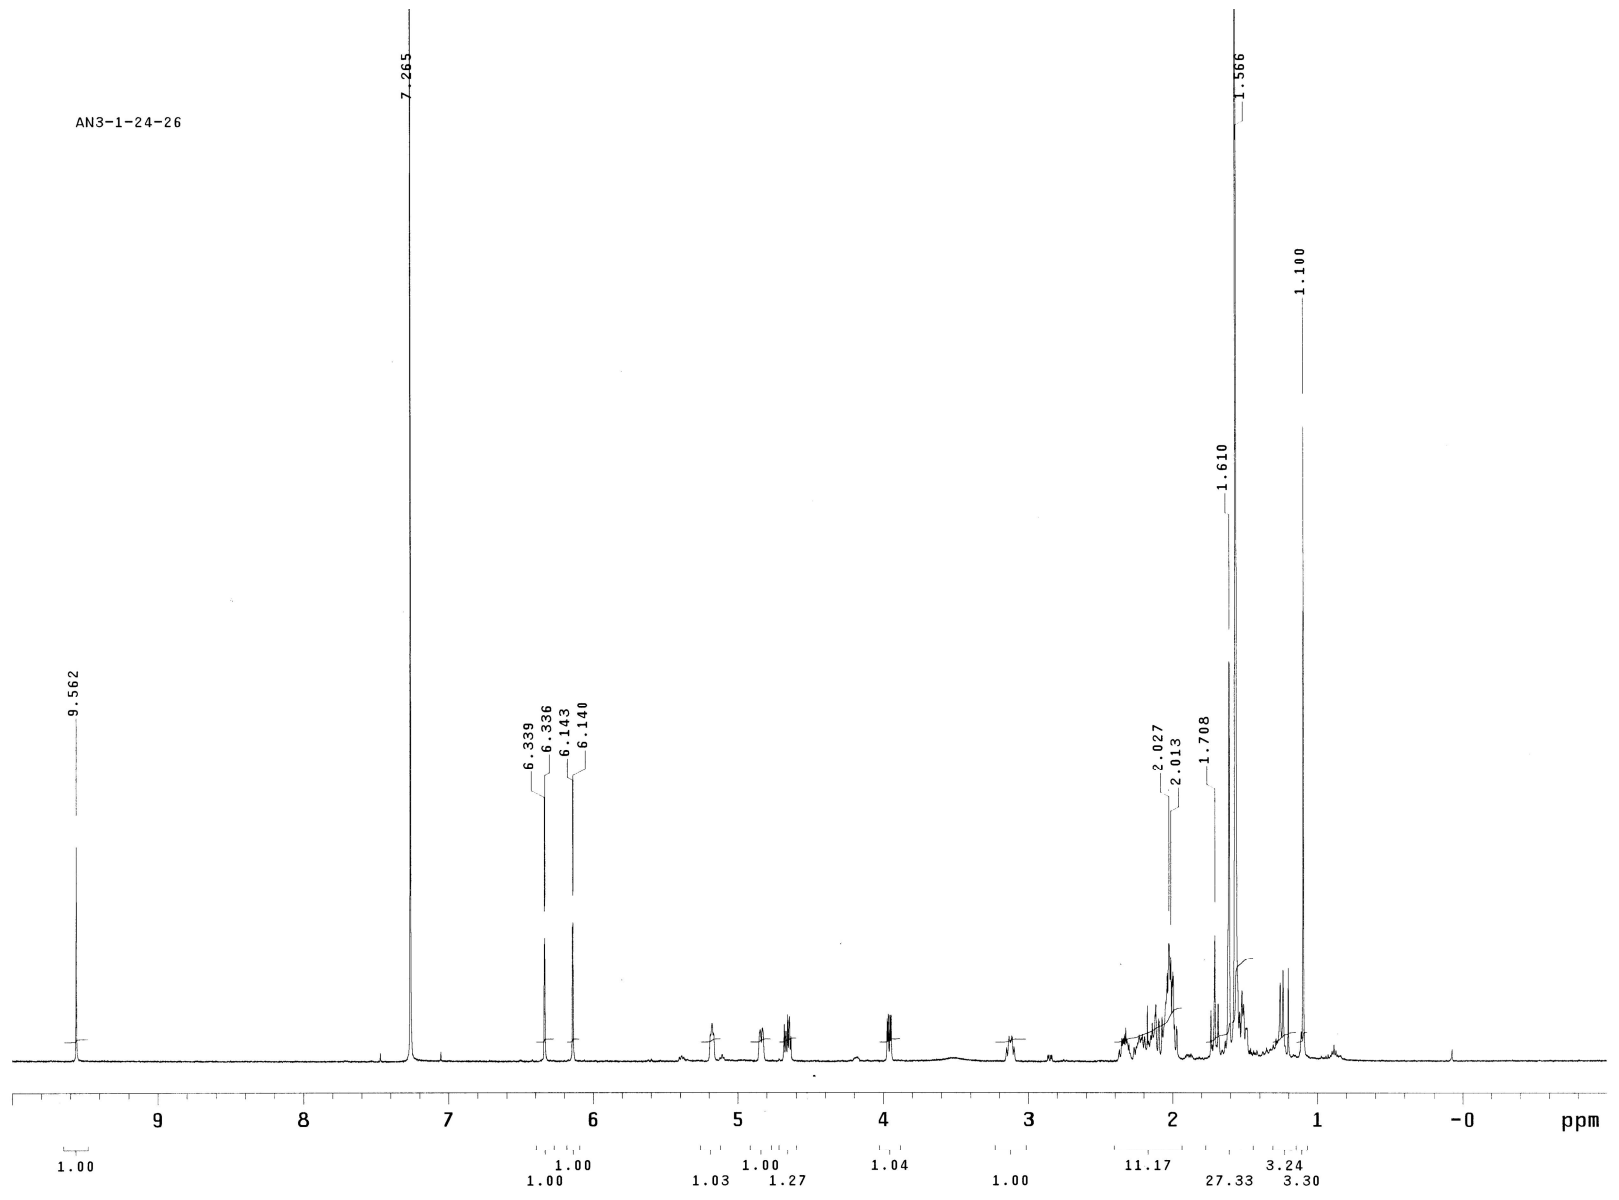

S2.  $^1\text{H}$  NMR spectrum of **1** in  $\text{CDCl}_3$  at 500 MHz.

AN3-1-24-26

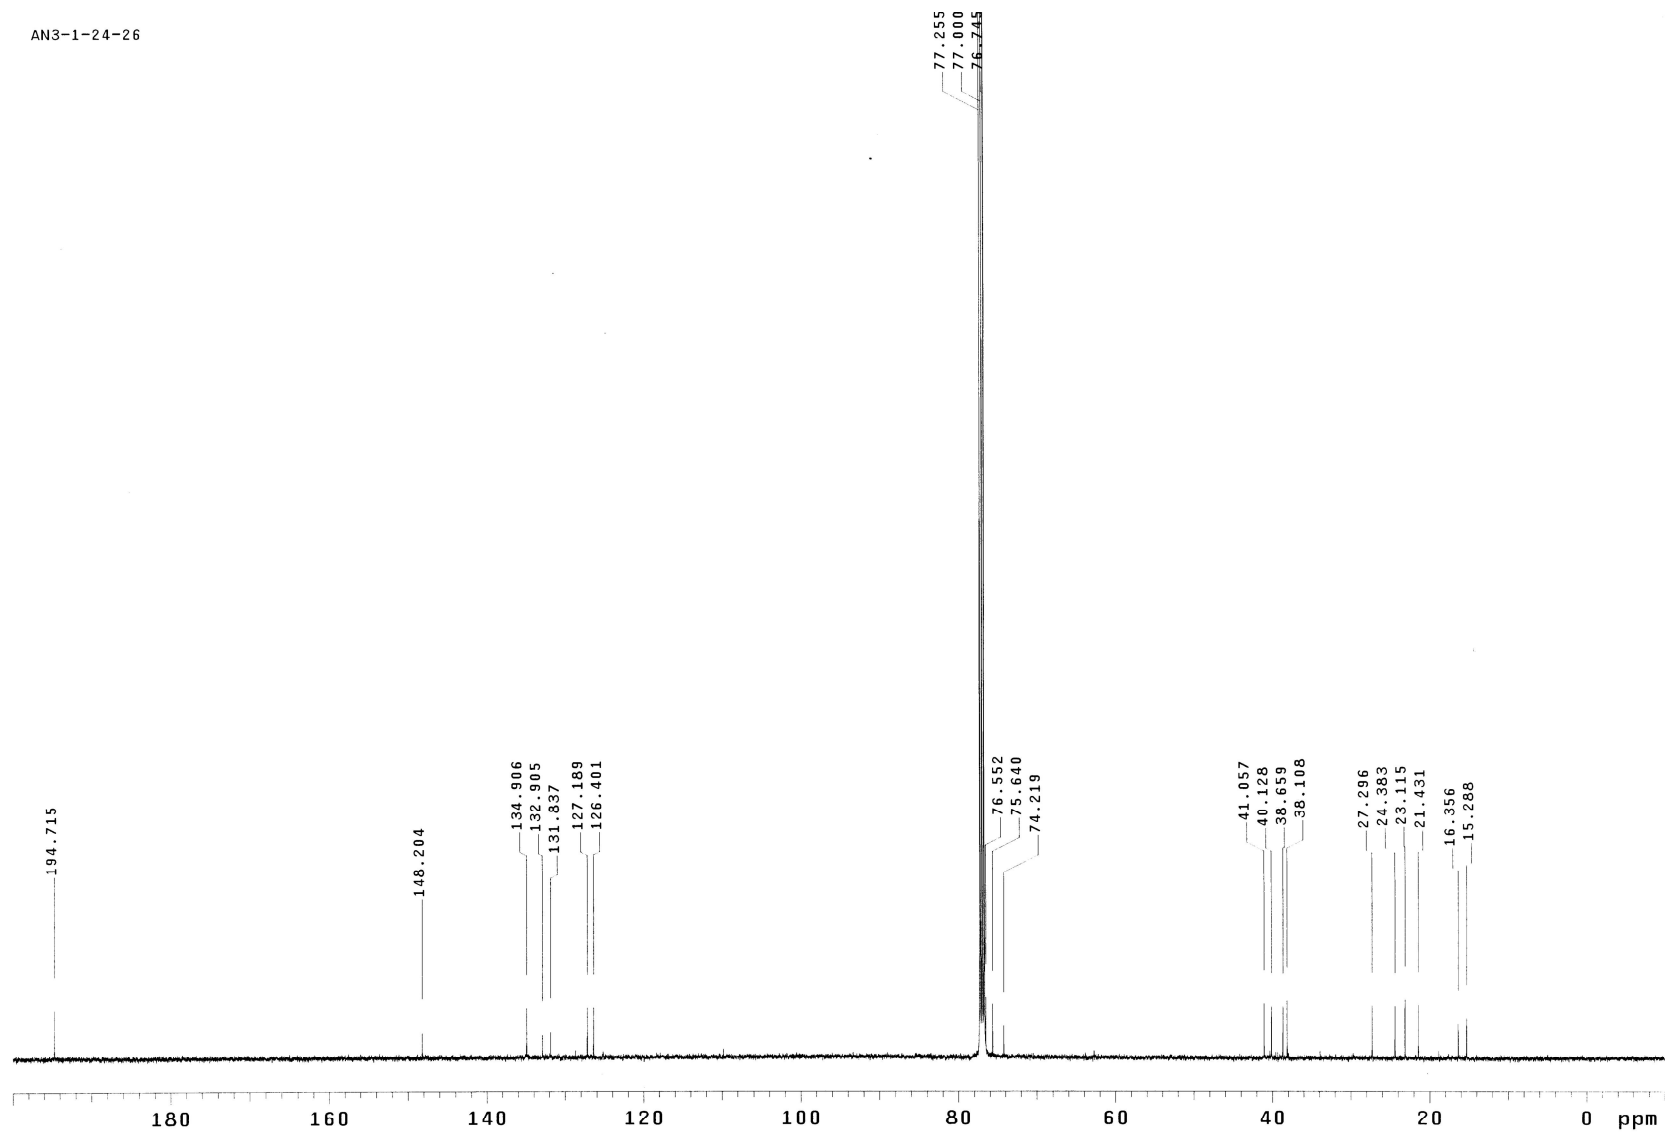

S3.  $^{13}\text{C}$  NMR spectrum of **1** in  $\text{CDCl}_3$  at 125 MHz.

AN-21-22

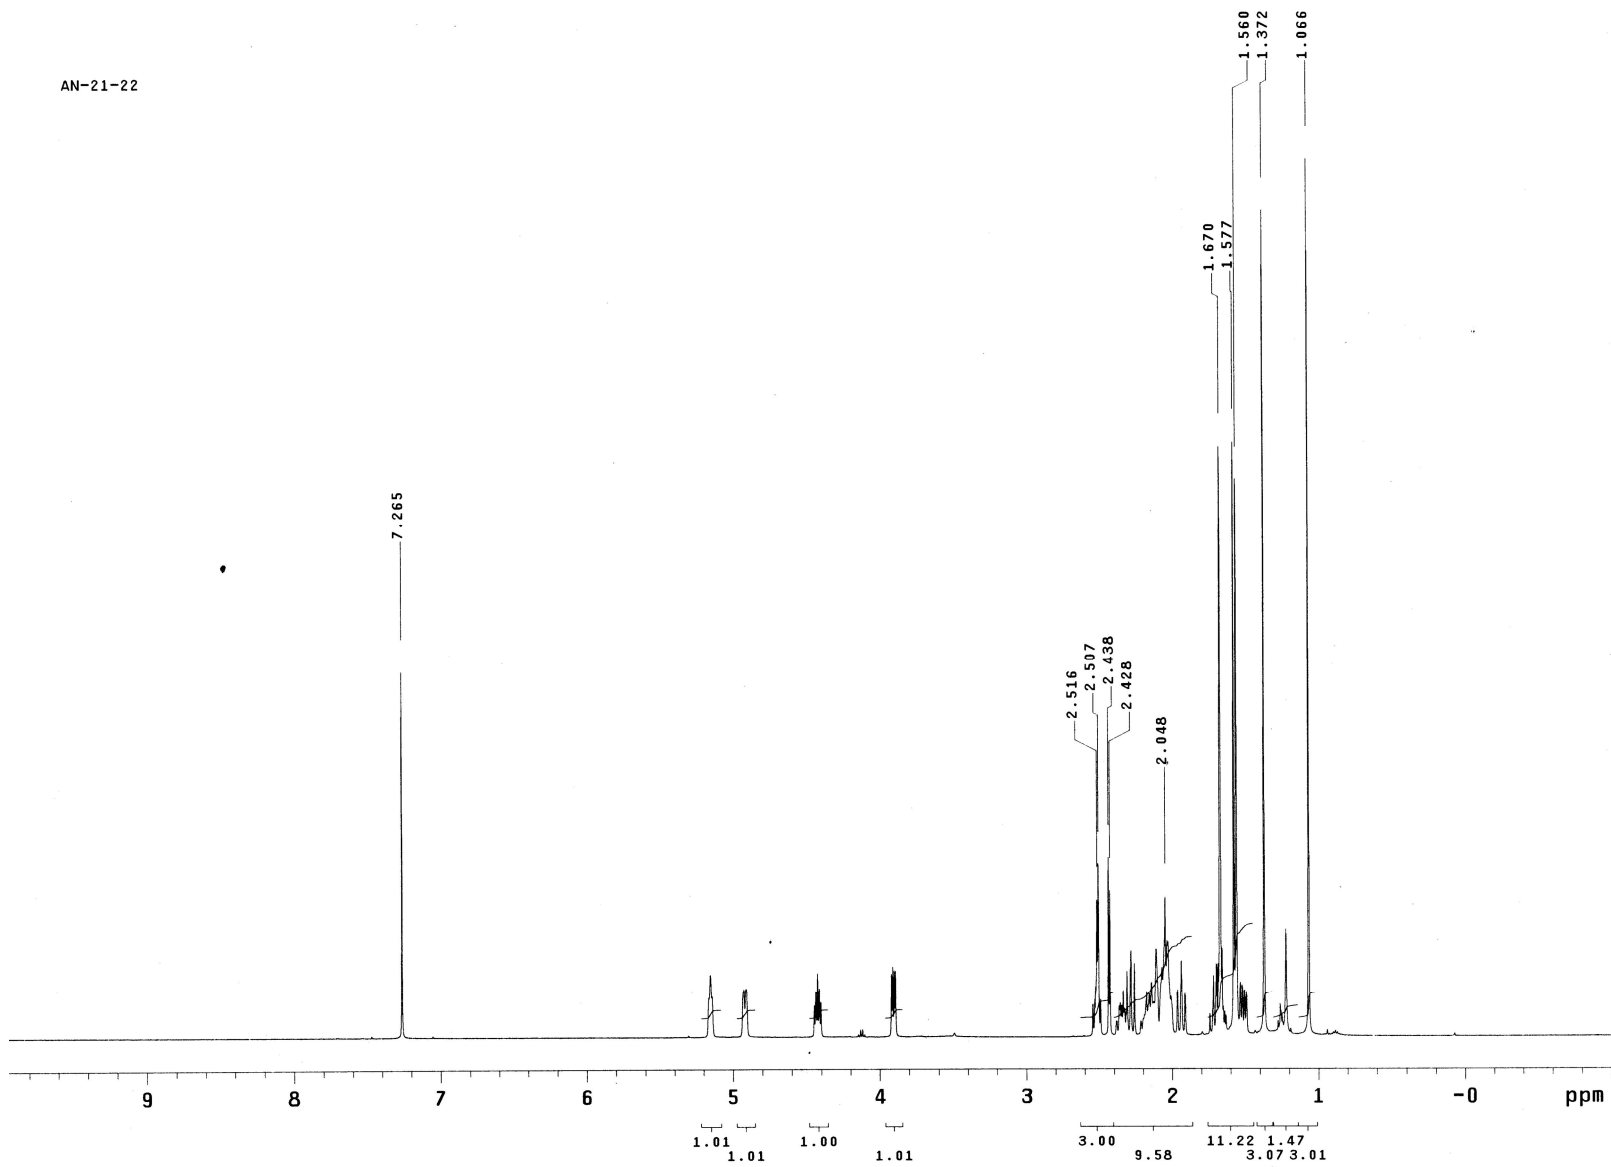

S4.  $^1\text{H}$  NMR spectrum of **2** in  $\text{CDCl}_3$  at 500 MHz.

AN-21-22

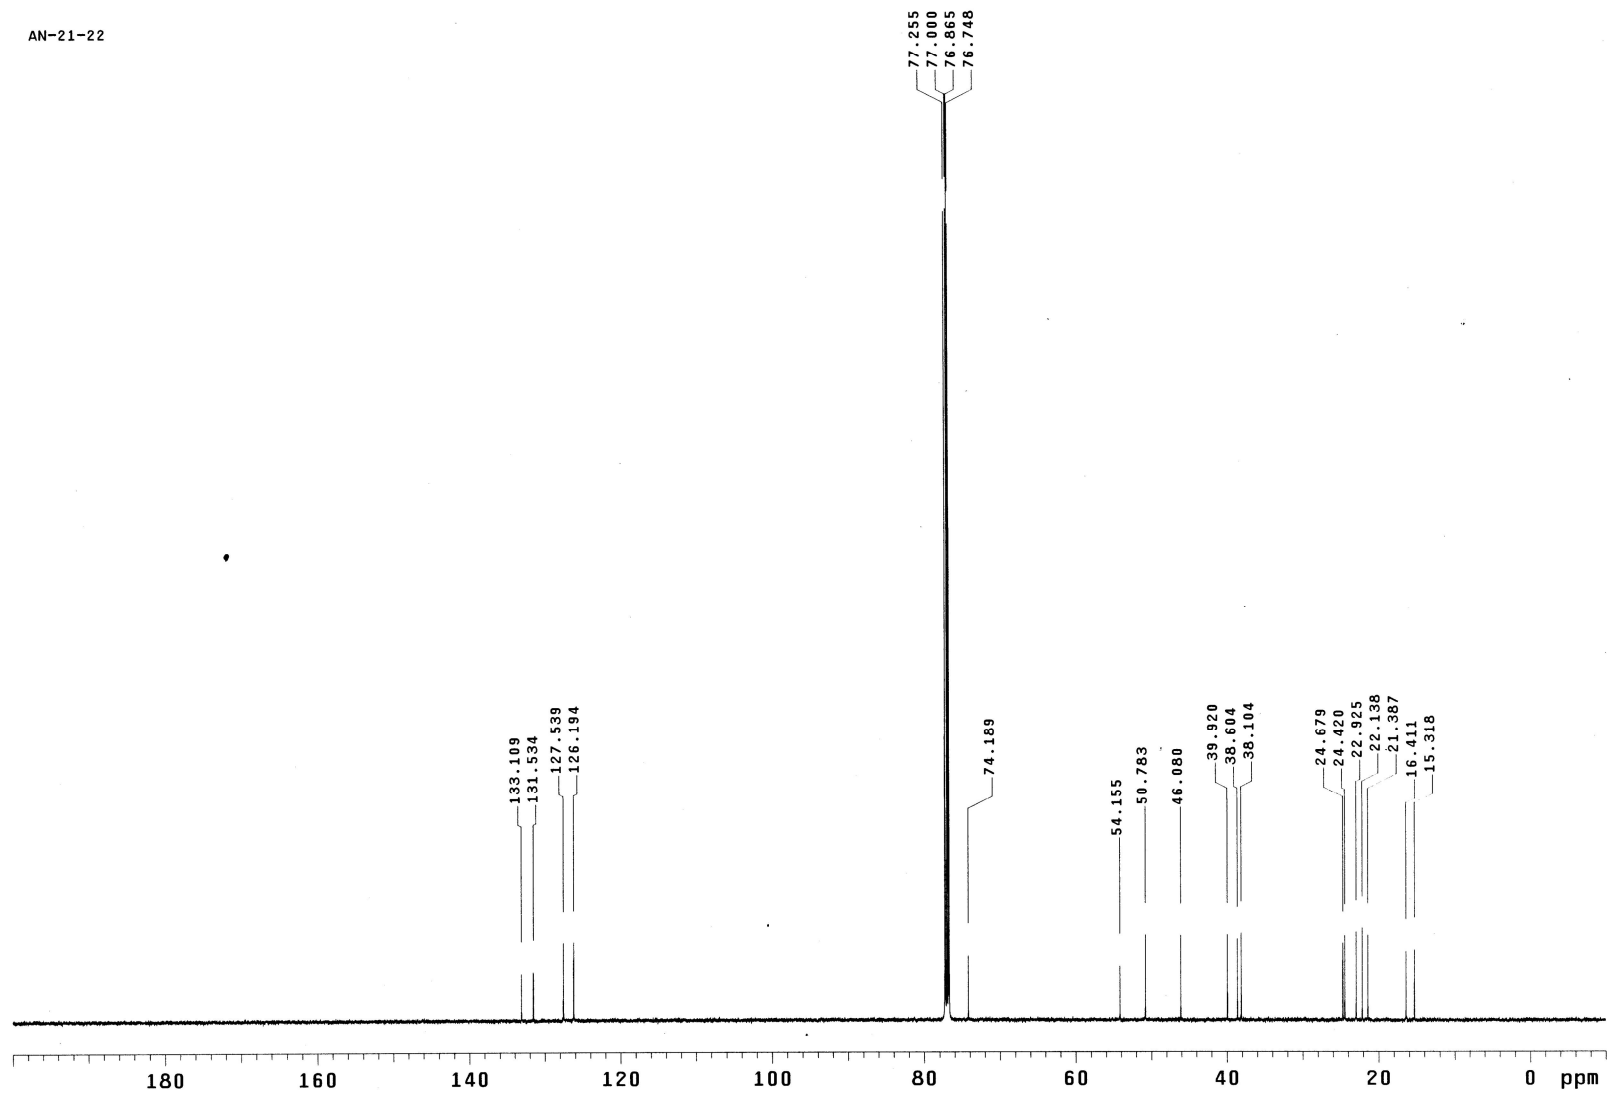

S5.  $^{13}\text{C}$  NMR spectrum of **2** in  $\text{CDCl}_3$  at 125 MHz.

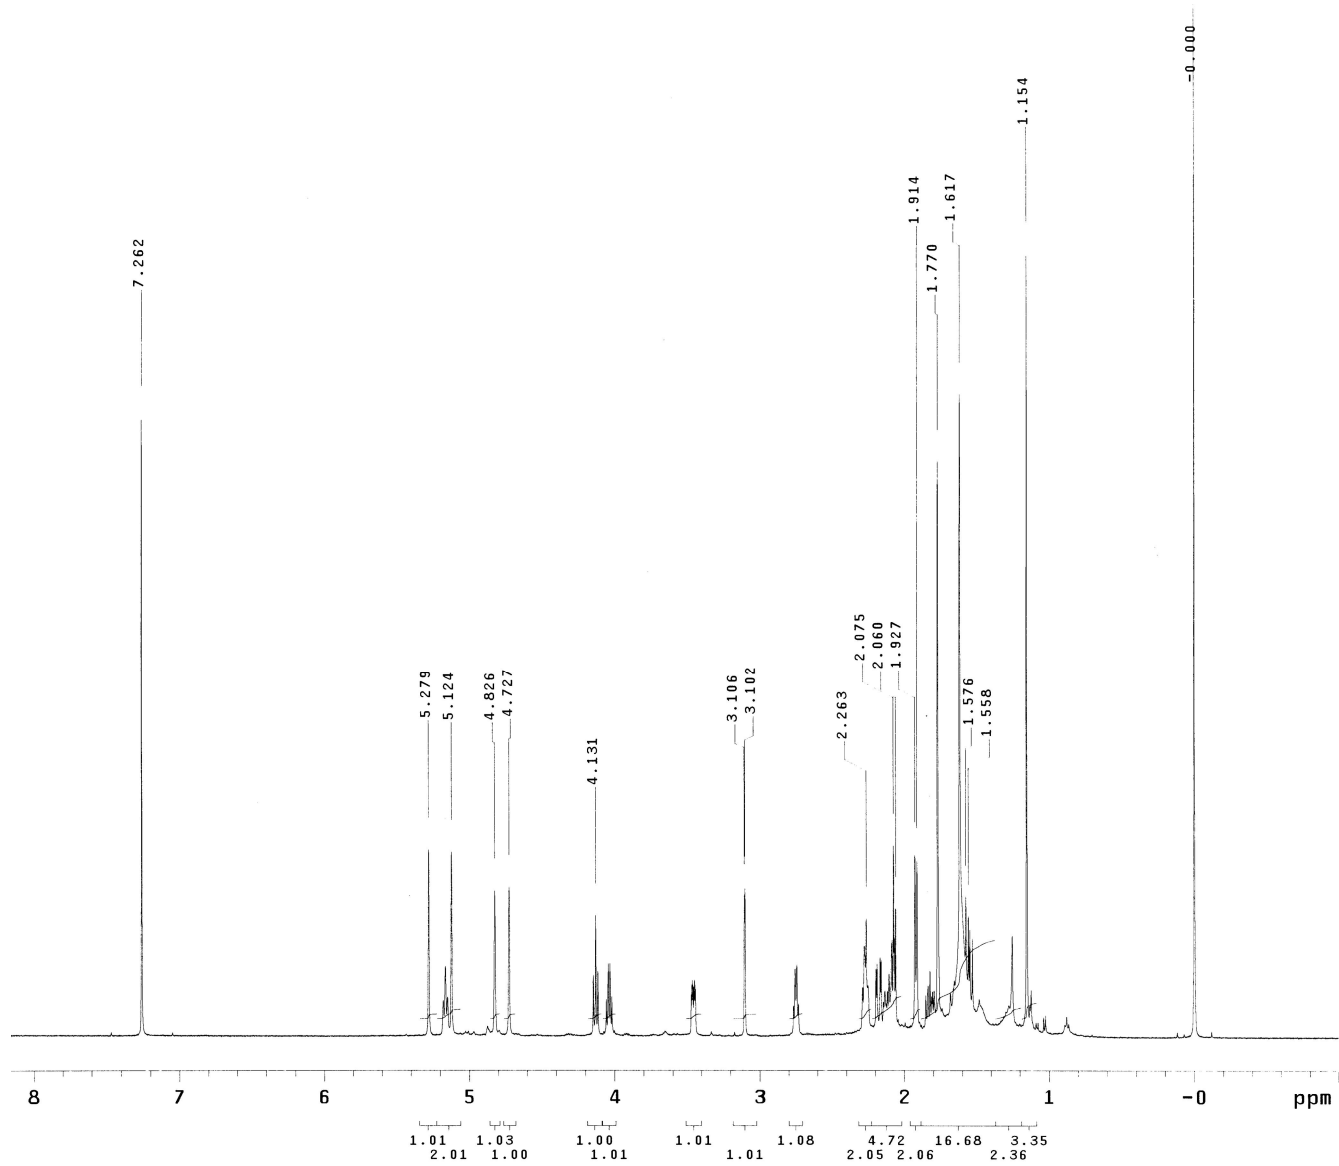

S6. <sup>1</sup>H NMR spectrum of **3** in CDCl<sub>3</sub> at 500 MHz.

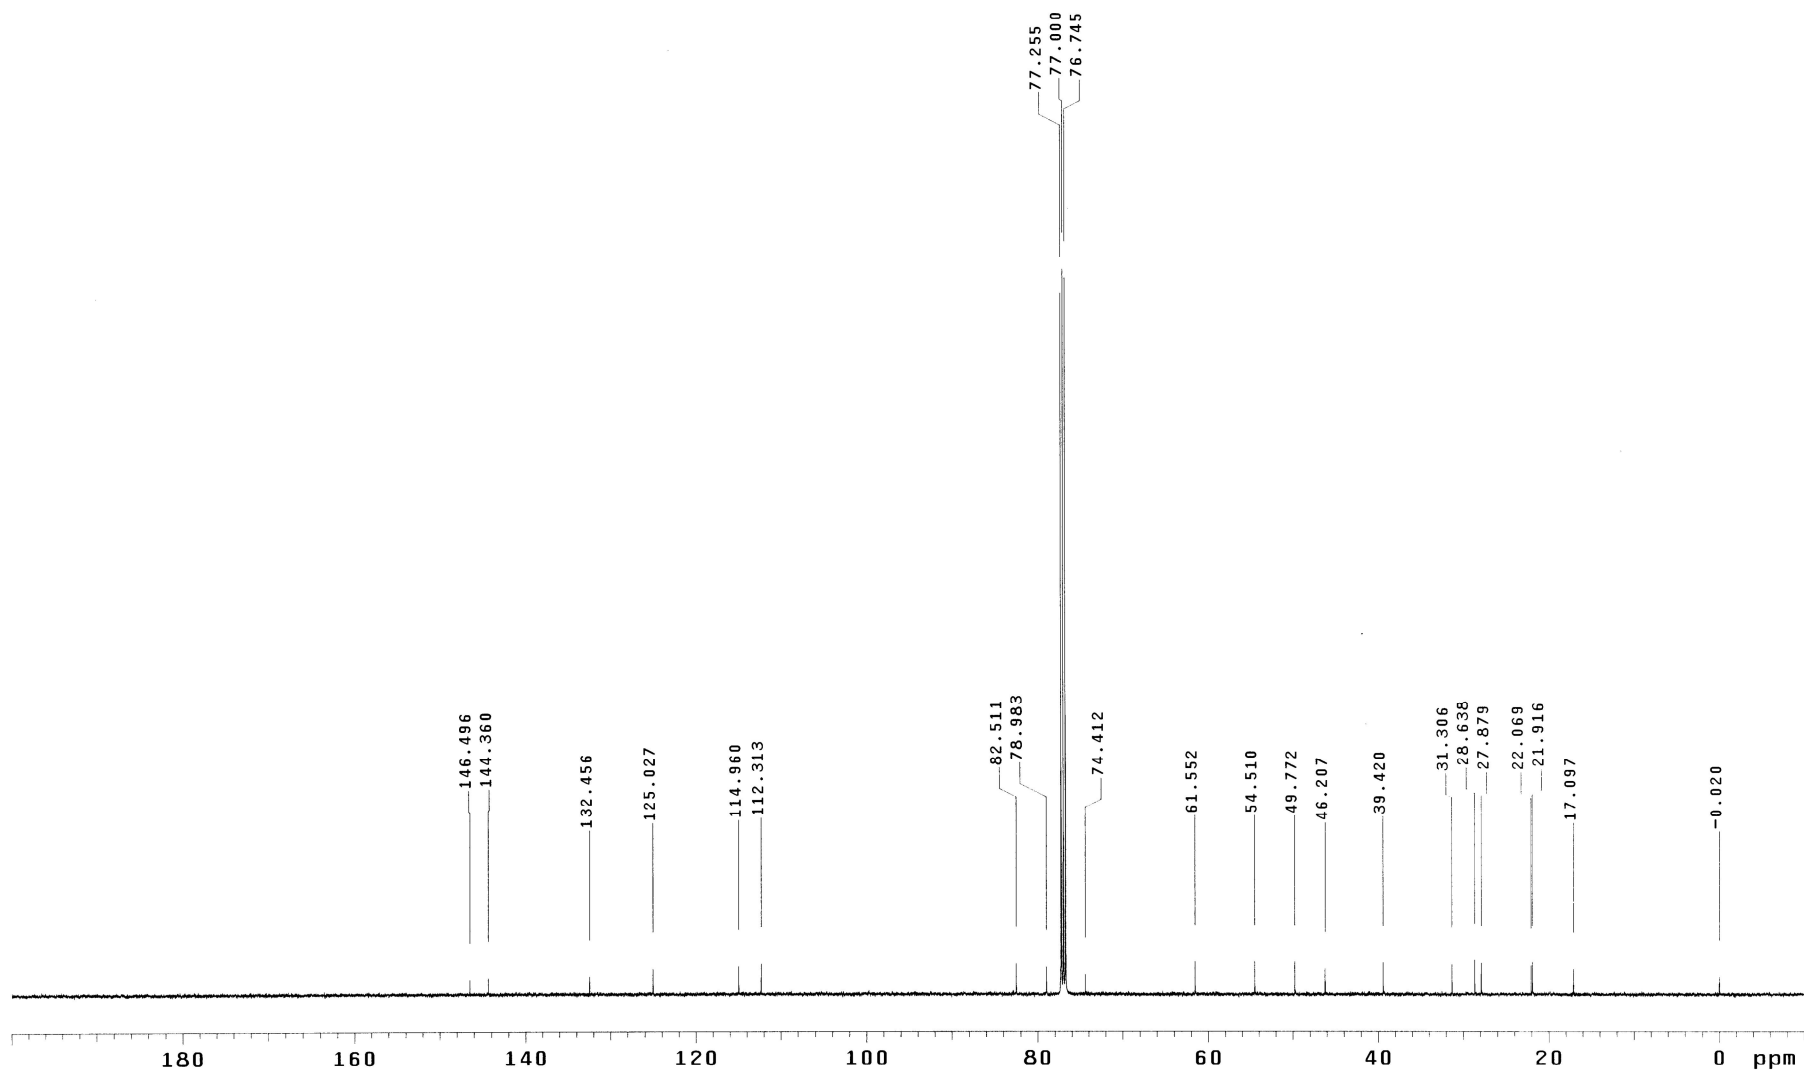

S7.  $^{13}\text{C}$  NMR spectrum of **3** in  $\text{CDCl}_3$  at 125 MHz.
